# Supplementary material
Source: PubMed Central journal article supplement (PMC544184)

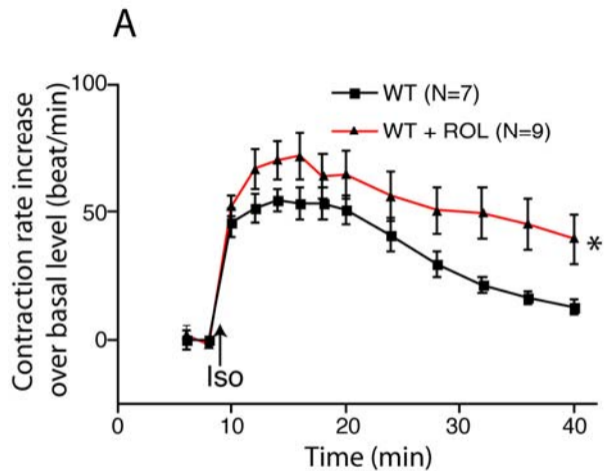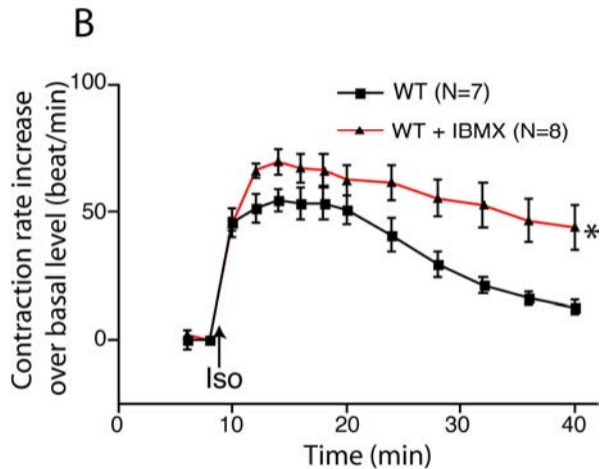

Supplement: pnas_102_3_909__1.pdf [file pnas_102_3_909__1.pdf]

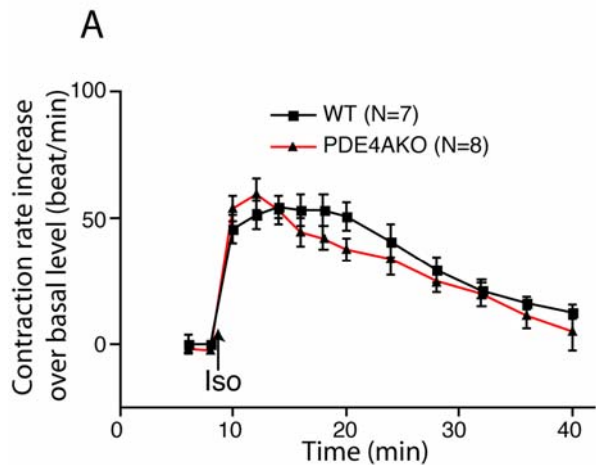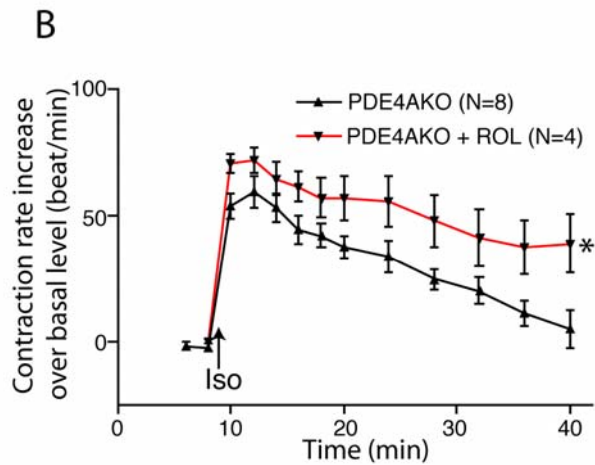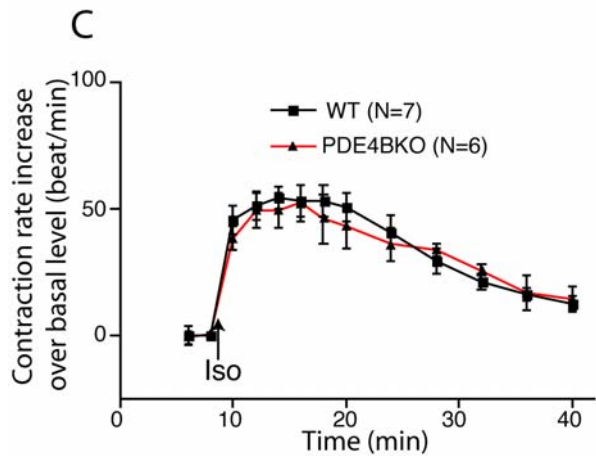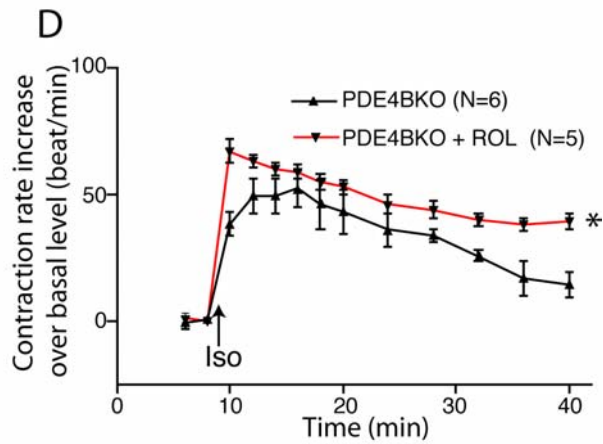

Supplement: pnas_102_3_909__2.pdf [file pnas_102_3_909__2.pdf]

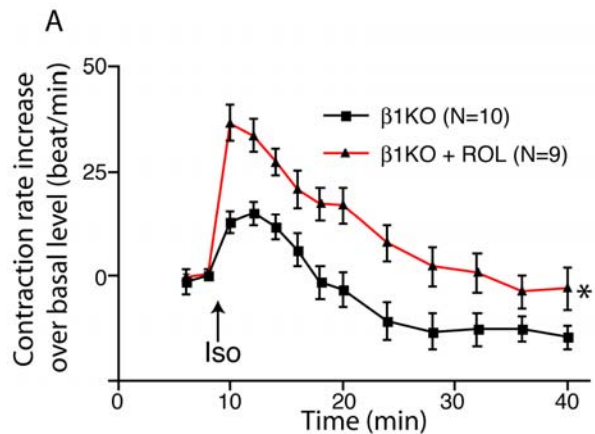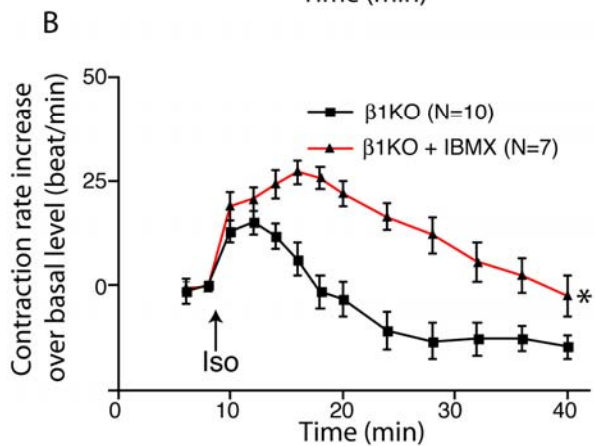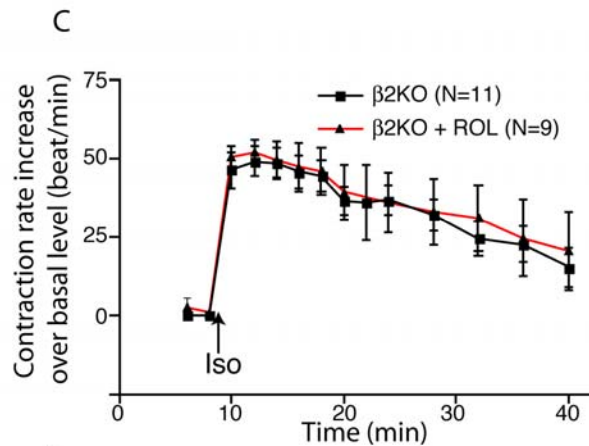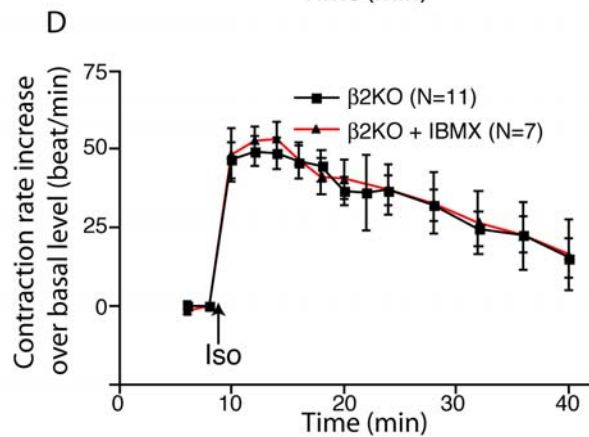

Supplement: pnas_102_3_909__3.pdf [file pnas_102_3_909__3.pdf]

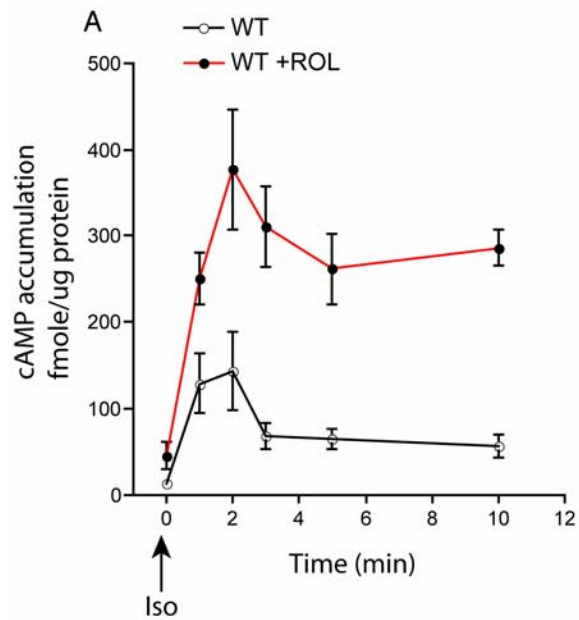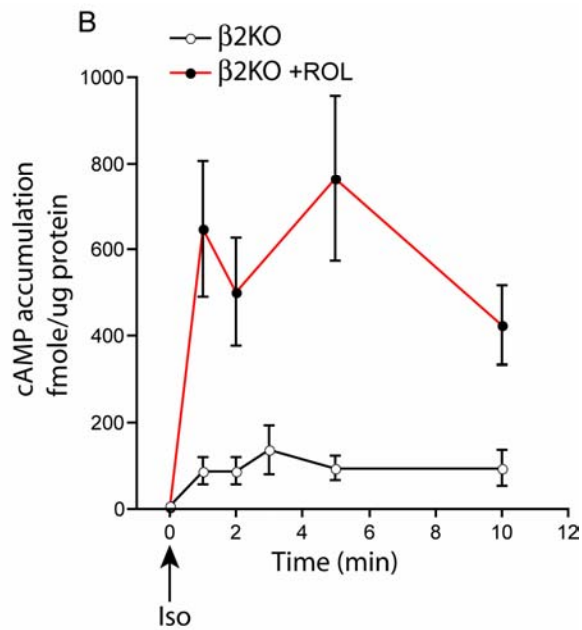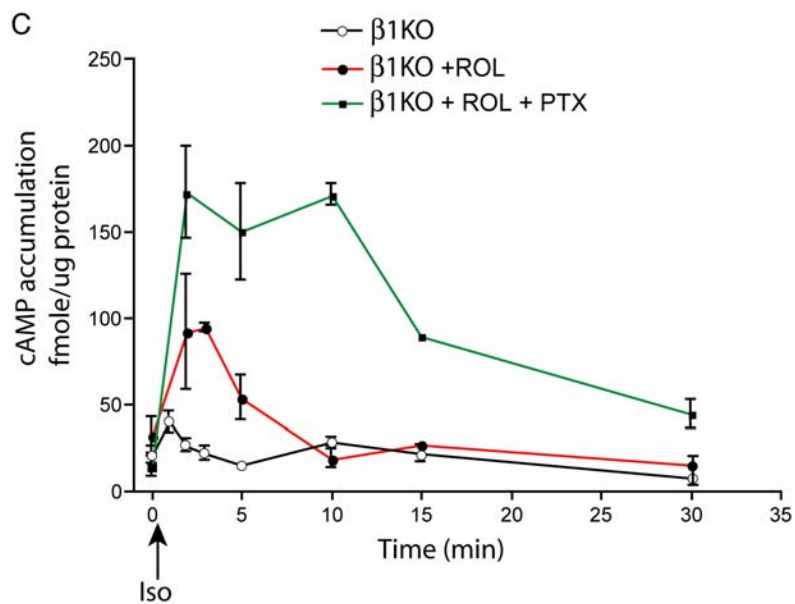

Supplement: pnas_102_3_909__4.pdf [file pnas_102_3_909__4.pdf]
